# Supplementary material
Source: publisher figshare collection journal article supplement (https://tandf.figshare.com/ndownloader/files/17927042)
Supplement: Supplementary file 1 [file 17927042]

# Analysis of the Fishery dataset.

library(rbart)
source("qinsamp.R")


# initialization of key params
dname="Fishery-Bart" #name of data file
burn=1000
nd=2000

# load the dataset
ddf = read.csv(paste0(dname,".csv"))
p=ncol(ddf)
y=ddf$y
x=rbartModelMatrix(ddf[,1:(p-1)])


# Make training/test sets.
set.seed(99) #just for reproducibility
train.index=sample(1:6806,4084)
xp=x[-train.index,]
x=x[train.index,]
yp=y[-train.index]
y=y[train.index]
p = ncol(x)
n = nrow(x)
np = nrow(xp)


# Variance prior
nu=3
sigq=0.90
qchi=qchisq(1.0-sigq,nu)
sighat=sd(y)
lambda=(sighat*sighat*qchi)/nu


# Now run the heteroscedastic model:
res = rbart(x,y,xp,ntree=200,nskip=burn,ndpost=nd,numcut=1000,k=5,tc=5,overallsd=sqrt(lambda),overallnu=nu)
resp = predict.rbart(res,x.test=xp)

# Run the homoscedastic model:
res.homo = rbart(x,y,xp,ntree=200,ntreeh=1,pbd=c(0.7,0.0),nskip=burn,ndpost=nd,numcut=1000,k=2,tc=5,overallsd=sqrt(lambda),overallnu=nu)
resp.homo = predict.rbart(res.homo,x.test=xp)


pdraw = resp$mdraws + resp$sdraws * matrix(rnorm(nd*np),nrow=nd)
pdraw.homo = resp.homo$mdraws + resp.homo$sdraws * matrix(rnorm(nd*np),nrow=nd)
qvec = qsamp(yp,pdraw)
qvec.homo = qsamp(yp,pdraw.homo)
qvec.plugin = rep(0,np)
for(i in 1:np) {
   qvec.plugin[i] = pnorm(yp[i],mean=resp$mmean[i],sd=resp$smean[i])
}
qplug=qqplot(qvec.plugin,runif(10000),plot.it=FALSE)


# RMSE
sqrt(mean((yp-resp$mmean)^2))
sqrt(mean((yp-resp.homo$mmean)^2))


# e-statistic
library(energy)
edist(matrix(c(qvec,runif(10000)),ncol=1),c(np,10000))
edist(matrix(c(qvec.homo,runif(10000)),ncol=1),c(np,10000))


# Fishery qq plot
pdf("qq-plot.pdf",width=14,height=6)
par(mfrow=c(1,2))
qqplot(qvec,runif(10000),col="grey",cex.lab=1.5,xlab="sample quantile",ylab="uniform",cex.axis=1.5)
abline(0,1,col="black",lwd=3)
lines(qplug$x,qplug$y,lty=2,lwd=1.5,col="black")
#title(main="(a) predictive qqplots, heteroscedastic model",cex.main=1.2)

qqplot(qvec.homo,runif(10000),col="grey",cex.lab=1.5,xlab="sample quantile",ylab="uniform",cex.axis=1.5)
abline(0,1,col="black",lwd=3)
#title(main="(b) predictive qqplots, homoscedastic model",cex.main=1.2)
dev.off()

# check heter plot
pdf("check-heter.pdf",width=8,height=8)
oo=order(resp$smean)
qm = apply(resp$sdraws,2,quantile,probs=c(.05,.95))
plot(c(resp$smean[oo[1]],resp$smean[oo[np]]),range(qm),type="n",xlab=expression(hat(s)(x)), ylab="s(x) posterior",cex.lab=1.4,cex.axis=1.2)
for(i in 1:np) lines(rep(resp$smean[oo[i]],2),qm[,oo[i]],col="gray")
abline(h=mean(resp.homo$smean[1]),col="black",lwd=3)
abline(h=quantile(resp.homo$sdraws,0.05),col="black",lty=2)
abline(h=quantile(resp.homo$sdraws,0.95),col="black",lty=2)
dev.off()
